# Supplementary material
Source: HighWire-hosted journal article supplement (https://jnm.snmjournals.org/highwire/filestream/95572/field_highwire_adjunct_files/0/226407_Supplemental_Data.pdf)
Supplement: 226407_Supplemental_Data.pdf [file 226407_Supplemental_Data.pdf]

## Supplemental Figure Legends

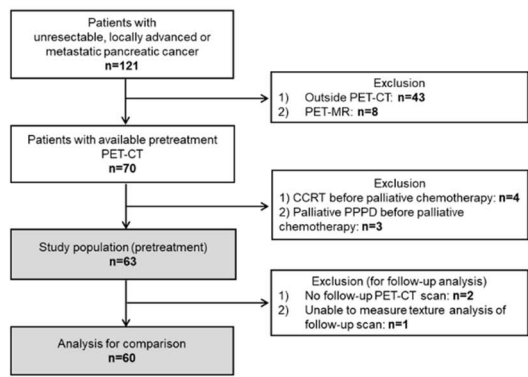

**Supplemental Fig. 1** Flow chart of enrollment of study participants.

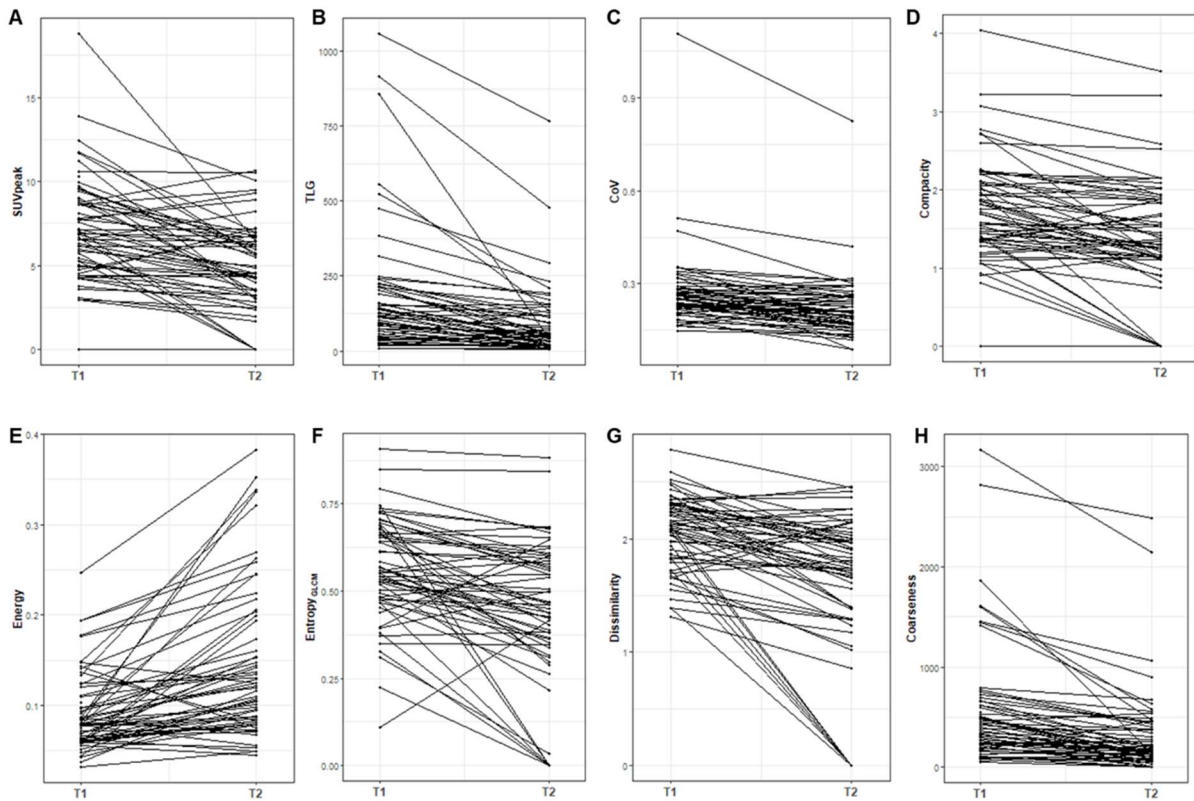

**Supplemental Fig. 2** Changes in metabolic parameters between 2 time points (T1 and T2) showing individual linear plots for the following: SUVpeak (A), TLG (B), CoV (C), compacity (D), energy (E), entropy<sub>GLCM</sub> (F), dissimilarity (G), and coarseness (H).

SUV= standardized uptake value; TLG = total lesion glycolysis; CoV = coefficient of variance; GLCM = gray-level co-occurrence matrix;

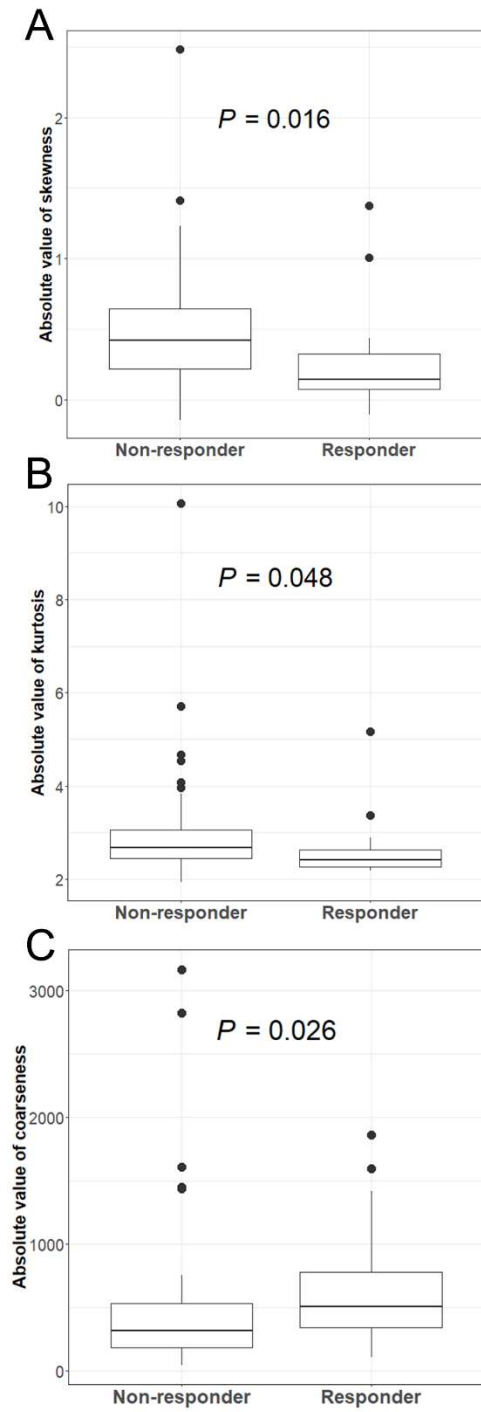

**Supplemental Fig. 3** Baseline metabolic parameters in relation to best response: skewness (A), kurtosis (B), and coarseness (C).

**Supplemental Table 1. Type of texture analysis parameters**

| <b>Category</b>          | <b>Parameter</b> | <b>Description</b>                                                                               |
|--------------------------|------------------|--------------------------------------------------------------------------------------------------|
| <b>Histogram Indices</b> | Skewness         | measures the asymmetry of the grey-level distribution in the histogram                           |
|                          | Kurtosis         | measures whether the grey-level distribution is peaked or flat relative to a normal distribution |
|                          | Entropy          | measures the randomness of the distribution                                                      |
|                          | Energy           | measures the uniformity of the distribution                                                      |
| <b>Shape Indices</b>     | Sphericity       | measures how spherical a volume of interest is                                                   |
|                          | Compactness      | measures the degree to which the volume of interest is compact                                   |
| <b>GLCM</b>              | Correlation      | linear dependency of grey-levels in GLCM                                                         |
|                          | Contrast         | local variations in the GLCM                                                                     |
|                          | Entropy          | randomness of grey-level voxel pairs                                                             |
| <b>NGLDM</b>             | Dissimilarity    | variation of grey-level voxel pairs                                                              |
|                          | Coarseness       | level of spatial rate of change in intensity                                                     |
|                          | Contrast         | intensity difference between neighboring regions                                                 |
|                          | Busyness         | spatial frequency of changes in intensity                                                        |

GLCM = gray-level co-occurrence matrix; NGLDM = neighboring gray-level dependence matrix;

**Supplemental Table 2. Baseline characteristics of study population (N=63)**

| <b>Variables</b>                                | <b>N</b> | <b>%</b>  |
|-------------------------------------------------|----------|-----------|
| <b>Age (yr), median (range)</b>                 | 60       | 40-84     |
| ≥60                                             | 34       | 54.0      |
| <60                                             | 29       | 46.0      |
| <b>Gender</b>                                   |          |           |
| Male                                            | 39       | 61.9      |
| Female                                          | 24       | 38.1      |
| <b>Initial disease status</b>                   |          |           |
| Locally advanced, unresectable                  | 14       | 22.2      |
| Metastatic                                      | 49       | 77.8      |
| <b>T stage</b>                                  |          |           |
| T2                                              | 5        | 7.9       |
| T3                                              | 18       | 38.6      |
| T4                                              | 40       | 63.5      |
| <b>N stage</b>                                  |          |           |
| N0                                              | 1        | 1.6       |
| N1                                              | 20       | 31.7      |
| N2                                              | 42       | 66.7      |
| <b>Comorbidity</b>                              |          |           |
| Hypertension                                    | 16       | 25.4      |
| DM                                              | 22       | 34.9      |
| <b>ECOG performance status</b>                  |          |           |
| 0                                               | 22       | 34.9      |
| 1-2                                             | 41       | 65.1      |
| <b>BMI (kg/m<sup>2</sup>), median (range)</b>   | 22.2     | 16.1-29.7 |
| ≥25                                             | 16       | 25.4      |
| 20-24.9                                         | 38       | 60.3      |
| <20                                             | 9        | 14.3      |
| <b>CEA (ng/mL), median (range)</b>              | 4.2      | 0.5-12990 |
| <b>CA 19-9 (U/mL), median (range)</b>           | 755      | 2-107400  |
| <b>WBC (x10<sup>3</sup>/uL), median (range)</b> | 6.3      | 2.6-13.8  |

|                                                                 |      |          |
|-----------------------------------------------------------------|------|----------|
| <b>Total bilirubin (mg/dL), median (range)</b>                  | 0.6  | 0.3-2.7  |
| <b>Albumin (mg/dL), median (range)</b>                          | 4    | 2.8-4.9  |
| <b>First-line chemotherapy</b>                                  |      |          |
| <b>Regimen</b>                                                  |      |          |
| FOLFIRINOX                                                      | 44   | 69.8     |
| Gemcitabine/nab-Paclitaxel                                      | 8    | 12.7     |
| Gemcitabine/Cisplatin                                           | 6    | 9.5      |
| Gemcitabine/Erlotinib                                           | 2    | 3.2      |
| Gemcitabine alone                                               | 3    | 4.8      |
| <b>Duration of first-line chemotherapy (mo), median (range)</b> | 5.2  | 0.8-29.4 |
| <b>Number of first-line chemotherapy cycles, median (range)</b> | 8    | 2-39     |
| <b>Dose reduction rate (%), median (range)</b>                  | 20   | 0-40     |
| <b>Best Response</b>                                            |      |          |
| Partial response                                                | 16   | 25.4     |
| Stable disease                                                  | 39   | 61.9     |
| Progressive disease                                             | 7    | 11.1     |
| Not evaluable                                                   | 1    | 1.6      |
| <b>Time to best response (mo), median (range)</b>               | 1.7  | 1-7.5    |
| <b>Cycles till best response, median (range)</b>                | 3    | 2-12     |
| <b>Progression-free survival (mo), median (95% CI)</b>          | 7.1  | 5.1-9.7  |
| <b>Overall survival (mo), median (95% CI)</b>                   | 10.1 | 8.6-12.7 |
| <b>Follow-up duration (mo), median (range)</b>                  | 11.2 | 1.3-31.6 |

---

yr = year; ECOG = Eastern Cooperative Oncology Group; BMI = body-mass index; CEA = Carcinoembryonic antigen; CA 19-9 = carbohydrate antigen 19-9; WBC = white blood cell; FOLFIRINOX = folfirinic acid/fluorouracil/irinotecan/oxaliplatin; mo = month; CI = confidence interval;

**Supplemental Table 3. Metabolic parameters at baseline (T1) and the first assessment (T2), and percent changes**

| Parameter                   | T1 (baseline) (N=63) |        |        |               | T2 (first assessment) (N=60) |        |        |             | Percent change* (N=60) |        |        |                 | P      |
|-----------------------------|----------------------|--------|--------|---------------|------------------------------|--------|--------|-------------|------------------------|--------|--------|-----------------|--------|
|                             | Mean                 | Sd     | Median | Range         | Mean                         | Sd     | Median | Range       | Mean                   | Sd     | Median | Range           |        |
| <b>Conventional Indices</b> |                      |        |        |               |                              |        |        |             |                        |        |        |                 |        |
| SUV <sub>max</sub>          | 8.62                 | 3.36   | 8.21   | 3.39—20.63    | 6.35                         | 2.71   | 6.1    | 2.04—12.70  | -22.03                 | 29.06  | -27.71 | -71.74—67.47    | <0.001 |
| SUV <sub>peak</sub>         | 7.13                 | 3.14   | 6.86   | 0—18.78       | 4.89                         | 2.66   | 4.73   | 0—10.66     | -27.69                 | 33.24  | -28.96 | -100—60.50      | <0.001 |
| TLG                         | 177.26               | 209.25 | 116.84 | 7.14—1058.73  | 88.57                        | 121.89 | 49.72  | 4.58—765.95 | -40.22                 | 48.9   | -47.16 | -96.42—158.51   | <0.001 |
| CoV                         | 0.27                 | 0.13   | 0.25   | 0.15—1.11     | 0.22                         | 0.10   | 0.21   | 0.09—0.82   | -15.99                 | 21.86  | -16.54 | -72.19—55.54    | <0.001 |
| MTV                         | 40                   | 50.88  | 25.65  | 1.71—332.75   | 26.12                        | 44.71  | 11.64  | 1.16—298.89 | -29.43                 | 48.12  | -35.19 | -96.93—123.51   | <0.001 |
| <b>Histogram Indices</b>    |                      |        |        |               |                              |        |        |             |                        |        |        |                 |        |
| Skewness                    | 0.43                 | 0.43   | 0.35   | -0.14—2.48    | 0.40                         | 0.36   | 0.37   | -0.24—1.77  | 33.93                  | 227.62 | -17.53 | -370.11—1069.95 | 0.757  |
| Kurtosis                    | 2.93                 | 1.17   | 2.6    | 1.94—10.06    | 2.92                         | 0.76   | 2.76   | 1.93—6.53   | 3.76                   | 21.69  | 3.18   | -47.73—67.91    | 0.242  |
| Entropy (log <sub>2</sub> ) | 3.79                 | 0.61   | 3.83   | 2.31—5.17     | 3.19                         | 0.78   | 3.27   | 1.57—4.62   | -15.38                 | 17.41  | -16.29 | -51.53—32.32    | <0.001 |
| Energy                      | 0.09                 | 0.04   | 0.08   | 0.03—0.25     | 0.15                         | 0.08   | 0.12   | 0.05—0.38   | 69.3                   | 87.55  | 45.99  | -47.48—341.29   | <0.001 |
| <b>Shape Indices</b>        |                      |        |        |               |                              |        |        |             |                        |        |        |                 |        |
| Sphericity                  | 0.98                 | 0.19   | 1.0    | 0—1.11        | 0.9                          | 0.33   | 1.02   | 0—1.12      | -9.14                  | 31.19  | -0.08  | -100—18.16      | 0.055  |
| Compacity                   | 1.74                 | 0.67   | 1.7    | 0—4.04        | 1.38                         | 0.73   | 1.32   | 0—3.52      | -22.53                 | 33     | -15.35 | -100—38.92      | <0.001 |
| <b>GLCM</b>                 |                      |        |        |               |                              |        |        |             |                        |        |        |                 |        |
| Contrast                    | 0.41                 | 0.09   | 0.4    | 0.24—0.63     | 0.42                         | 0.18   | 0.42   | 0—0.72      | 5.25                   | 41.01  | 11.9   | -100—90.09      | 0.601  |
| Correlation                 | 0.015                | 0.013  | 0.01   | 0.002—0.074   | 0.027                        | 0.033  | 0.015  | 0—0.17      | 128.78                 | 232.49 | 79.41  | -100—1157.532   | <0.001 |
| Entropy (log <sub>2</sub> ) | 0.57                 | 0.15   | 0.56   | 0.11—0.91     | 0.43                         | 0.22   | 0.46   | 0—0.88      | -18.96                 | 52.77  | -17.09 | -100—281.39     | <0.001 |
| Dissimilarity               | 2.06                 | 0.32   | 2.11   | 1.31—2.78     | 1.59                         | 0.68   | 1.77   | 0—2.46      | -22.07                 | 30.49  | -16.38 | -100—29.33      | <0.001 |
| <b>NGLDM</b>                |                      |        |        |               |                              |        |        |             |                        |        |        |                 |        |
| Coarseness                  | 569.06               | 610.23 | 399.42 | 49.18—3167.41 | 312.78                       | 438.46 | 169.33 | 0—2486.26   | -39.46                 | 49.51  | -44.51 | -100—158.43     | <0.001 |
| Contrast                    | 0.89                 | 0.05   | 0.9    | 0.73—0.96     | 0.77                         | 0.29   | 0.87   | 0—0.96      | -12.36                 | 30.29  | -2.06  | -100—6.90       | <0.001 |
| Busyness                    | 0.022                | 0.015  | 0.018  | 0.004—0.071   | 0.03                         | 0.02   | 0.02   | 0—0.09      | 69.48                  | 154.68 | 30.37  | -100—825.26     | 0.02   |

SUV = standardized uptake values; TLG = total lesion glycolysis; CoV = coefficient of variation; MTV = metabolic tumor volume; GLCM = gray-level co-occurrence matrix; NGLDM = neighboring gray-level dependence matrix;

\*The percent change was calculated by  $100 \times [\text{value at the first assessment (T2)} - \text{value at the baseline (T1)}] / \text{value at the baseline (T1)}$

**Supplemental Table 4. ROC curve of Parameters**

|                              | PFS           |         | OS            |         |
|------------------------------|---------------|---------|---------------|---------|
|                              | Cut-off value | AUC-ROC | Cut-off value | AUC-ROC |
| <b>T1 (baseline)</b>         |               |         |               |         |
| <b>Conventional Indices</b>  |               |         |               |         |
| SUV <sub>max</sub>           | 5.078         | 0.590   | 7.603         | 0.600   |
| SUV <sub>peak</sub>          | 4.418         | 0.604   | 4.418         | 0.607   |
| TLG                          | 81.351        | 0.669   | 81.351        | 0.643   |
| CoV                          | 0.185         | 0.551   | 0.229         | 0.625   |
| MTV                          | 17.786        | 0.635   | 17.786        | 0.627   |
| <b>Histogram Indices</b>     |               |         |               |         |
| Skewness                     | 0.151         | 0.621   | 0.119         | 0.579   |
| Kurtosis                     | 2.614         | 0.627   | 2.562         | 0.620   |
| Entropy (log2)               | 3.885         | 0.573   | 3.942         | 0.609   |
| Energy                       | 0.043         | 0.449   | 0.048         | 0.402   |
| <b>Shape Indices</b>         |               |         |               |         |
| Sphericity                   | 0.971         | 0.632   | 0.956         | 0.552   |
| Compacity                    | 1.403         | 0.649   | 1.403         | 0.652   |
| <b>GLCM</b>                  |               |         |               |         |
| Contrast                     | 0.332         | 0.43    | 0.246         | 0.44    |
| Correlation                  | 0.0037        | 0.452   | 0.0043        | 0.402   |
| Entropy (log2)               | 0.494         | 0.489   | 0.644         | 0.556   |
| Dissimilarity                | 1.791         | 0.576   | 1.816         | 0.611   |
| <b>NGLDM</b>                 |               |         |               |         |
| Coarseness                   | 297.301       | 0.588   | 297.301       | 0.611   |
| Contrast                     | 0.881         | 0.585   | 0.884         | 0.568   |
| Busyness                     | 0.047         | 0.397   | -Inf          | 0.394   |
| <b>T2 (first assessment)</b> |               |         |               |         |
| <b>Conventional Indices</b>  |               |         |               |         |
| SUV <sub>max</sub>           | 7.037         | 0.731   | 7.738         | 0.614   |
| SUV <sub>peak</sub>          | 5.733         | 0.755   | 4.529         | 0.59    |
| TLG                          | 48.946        | 0.802   | 69.265        | 0.663   |
| CoV                          | 0.215         | 0.787   | 0.178         | 0.65    |
| MTV                          | 8.717         | 0.796   | 25.099        | 0.669   |
| <b>Histogram Indices</b>     |               |         |               |         |
| Skewness                     | 0.552         | 0.579   | 0.348         | 0.521   |
| Kurtosis                     | 2.943         | 0.648   | 2.448         | 0.562   |
| Entropy (log2)               | 3.536         | 0.768   | 2.474         | 0.622   |
| Energy                       | 0.045         | 0.261   | 0.072         | 0.381   |



|                             |          |       |          |       |
|-----------------------------|----------|-------|----------|-------|
| <b>Shape Indices</b>        |          |       |          |       |
| Sphericity                  | 0.961    | 0.604 | 0.936    | 0.447 |
| Compacity                   | 1.14     | 0.817 | 1.171    | 0.659 |
| <b>GLCM</b>                 |          |       |          |       |
| Contrast                    | 0.368    | 0.566 | 0.319    | 0.535 |
| Correlation                 | 0        | 0.473 | 0.009    | 0.503 |
| Entropy (log2)              | 0.365    | 0.842 | 0.498    | 0.673 |
| Dissimilarity               | 1.768    | 0.782 | 1.289    | 0.609 |
| <b>NGLDM</b>                |          |       |          |       |
| Coarseness                  | 141.094  | 0.803 | 104.343  | 0.67  |
| Contrast                    | 0.797    | 0.652 | 0.856    | 0.556 |
| Busyness                    | 0        | 0.426 | 0        | 0.429 |
| <b>Percent change</b>       |          |       |          |       |
| <b>Conventional Indices</b> |          |       |          |       |
| SUV <sub>max</sub>          | -1.427   | 0.559 | -22.688  | 0.475 |
| SUV <sub>peak</sub>         | -15.454  | 0.625 | 9.566    | 0.468 |
| TLG                         | -86.113  | 0.64  | -86.113  | 0.493 |
| CoV                         | -26.869  | 0.778 | -26.869  | 0.558 |
| MTV                         | -69.988  | 0.648 | -78.286  | 0.51  |
| <b>Histogram Indices</b>    |          |       |          |       |
| Skewness                    | -370.108 | 0.386 | -348.952 | 0.507 |
| Kurtosis                    | -25.780  | 0.487 | 14.883   | 0.423 |
| Entropy (log2)              | -17.802  | 0.76  | -13.379  | 0.556 |
| Energy                      | 234.991  | 0.317 | 4.415    | 0.472 |
| <b>Shape Indices</b>        |          |       |          |       |
| Sphericity                  | -11.001  | 0.477 | -6.102   | 0.417 |
| Compacity                   | -37.465  | 0.705 | -13.403  | 0.554 |
| <b>GLCM</b>                 |          |       |          |       |
| Contrast                    | -100     | 0.54  | -3.631   | 0.538 |
| Correlation                 | -100     | 0.449 | -18.871  | 0.539 |
| Entropy (log2)              | -26.118  | 0.861 | -26.118  | 0.593 |
| Dissimilarity               | -21.951  | 0.742 | -21.545  | 0.535 |
| <b>NGLDM</b>                |          |       |          |       |
| Coarseness                  | -73.38   | 0.669 | -43.184  | 0.54  |
| Contrast                    | -15.94   | 0.559 | -15.940  | 0.478 |
| Busyness                    | -9.242   | 0.48  | -25.591  | 0.492 |

ROC = receiver operating characteristics; AUC-ROC = area under the ROC curve; PFS = progression-free survival; OS = overall survival; SUV = standardized uptake values; Sd = standard deviation; TLG = total lesion glycolysis; CoV = coefficient of variation; MTV = metabolic tumor volume; GLCM = gray-level co-occurrence matrix; NGLDM = neighboring gray-level dependence matrix;

**Supplemental Table 5. Univariate Cox regression analysis for PFS and OS**

|                                                                          | PFS  |                      |       | OS   |                     |       |
|--------------------------------------------------------------------------|------|----------------------|-------|------|---------------------|-------|
|                                                                          | HR   | 95% CI               | P     | HR   | 95% CI              | P     |
| <b>Clinical variables</b>                                                |      |                      |       |      |                     |       |
| Age ( $\geq 60$ vs. $< 60$ (ref))                                        | 1.1  | 0.65-1.89            | 0.716 | 1.31 | 0.76-2.25           | 0.336 |
| Gender (male vs. female (ref))                                           | 1.31 | 0.75-2.31            | 0.344 | 1.05 | 0.60-1.82           | 0.868 |
| Initial disease status (metastatic vs. locally advanced (ref))           | 1.48 | 0.76-2.89            | 0.246 | 1.56 | 0.78-3.10           | 0.208 |
| First-line chemotherapy regimen (FOLFIRINOX vs. gemcitabine-based (ref)) | 0.66 | 0.37-1.18            | 0.165 | 0.66 | 0.37-1.19           | 0.170 |
| BMI ( $\geq 25$ vs. 20-24.9 (ref))                                       | 1.08 | 0.57-2.03            | 0.807 | 0.78 | 0.34-1.76           | 0.546 |
| BMI ( $< 20$ vs. 20-24.9 (ref))                                          | 0.44 | 0.18-1.05            | 0.062 | 1.46 | 0.72-2.55           | 0.342 |
| DM (yes vs. no (ref))                                                    | 0.84 | 0.46-1.55            | 0.578 | 1.1  | 0.62-1.96           | 0.749 |
| Hypertension (yes vs. no (ref))                                          | 0.97 | 0.54-1.72            | 0.907 | 0.84 | 0.46-1.53           | 0.564 |
| ECOG performance status (1-2 vs. 0 (ref))                                | 0.98 | 0.56-1.72            | 0.942 | 1.16 | 0.66-2.03           | 0.606 |
| CEA ( $\geq 10$ vs. $< 10$ (ref))                                        | 1.31 | 0.74-2.32            | 0.354 | 1.62 | 0.92-2.88           | 0.096 |
| CA 19-9 ( $\geq 755$ vs. $< 755$ (ref))                                  | 1.86 | 1.08-3.19            | 0.024 | 1.81 | 1.05-3.11           | 0.031 |
| Total bilirubin ( $\geq 1.3$ vs. $< 1.3$ (ref))                          | 1.05 | 0.42-2.65            | 0.919 | 0.9  | 0.32-2.51           | 0.843 |
| Albumin ( $< 3.3$ vs. $\geq 3.3$ (ref))                                  | 1.81 | 0.77-4.26            | 0.176 | 2.15 | 0.90-5.13           | 0.084 |
| Best response (non-responder vs. responder (ref))                        | 1.91 | 1.03-3.54            | 0.039 | 1.42 | 0.77-2.59           | 0.258 |
| <b>T1 (baseline)</b>                                                     |      |                      |       |      |                     |       |
| <b>Conventional Indices</b>                                              |      |                      |       |      |                     |       |
| SUV <sub>max</sub>                                                       |      | <i>Not included*</i> |       | 1.53 | 0.87-2.67           | 0.138 |
| SUV <sub>peak</sub>                                                      | 1.68 | 0.84-3.36            | 0.144 | 3.02 | 1.36-6.74           | 0.007 |
| TLG                                                                      | 1.31 | 0.72-2.38            | 0.378 | 1.60 | 0.87-2.95           | 0.129 |
| CoV                                                                      |      | <i>Not included</i>  |       | 1.64 | 0.91-2.93           | 0.098 |
| MTV                                                                      | 1.51 | 0.85-2.69            | 0.158 | 1.42 | 0.80-2.54           | 0.228 |
| <b>Histogram Indices</b>                                                 |      |                      |       |      |                     |       |
| Skewness                                                                 | 2.07 | 1.14-3.77            | 0.017 |      | <i>Not included</i> |       |
| Kurtosis                                                                 | 1.69 | 0.99-2.90            | 0.056 | 1.41 | 0.82-2.43           | 0.209 |
| Entropy (log <sub>2</sub> )                                              |      | <i>Not included</i>  |       | 1.43 | 0.83-2.45           | 0.196 |
| <b>Shape Indices</b>                                                     |      |                      |       |      |                     |       |
| Sphericity                                                               | 1.74 | 0.87-3.47            | 0.118 |      | <i>Not included</i> |       |
| Compacity                                                                | 1.85 | 1.01-3.36            | 0.045 | 1.89 | 1.92-3.49           | 0.042 |
| <b>GLCM</b>                                                              |      |                      |       |      |                     |       |
| Dissimilarity                                                            |      | <i>Not included</i>  |       | 2.16 | 1.05-4.47           | 0.037 |
| <b>NGLDM</b>                                                             |      |                      |       |      |                     |       |
| Coarseness                                                               |      | <i>Not included</i>  |       | 1.68 | 0.93-3.04           | 0.087 |
| <b>T2 (first assessment)</b>                                             |      |                      |       |      |                     |       |

|                             |      |           |        |      |                     |       |
|-----------------------------|------|-----------|--------|------|---------------------|-------|
| <b>Conventional Indices</b> |      |           |        |      |                     |       |
| SUV <sub>max</sub>          | 2.16 | 1.18-3.97 | 0.013  | 2    | 1.10-3.65           | 0.024 |
| SUV <sub>peak</sub>         | 1.84 | 1.01-3.34 | 0.046  |      | <i>Not included</i> |       |
| TLG                         | 1.5  | 0.86-2.61 | 0.149  | 2.18 | 1.21-3.92           | 0.01  |
| CoV                         | 2.57 | 1.38-4.78 | 0.003  | 2.52 | 1.32-4.79           | 0.005 |
| MTV                         | 1.75 | 0.99-3.10 | 0.053  | 1.61 | 0.90-2.86           | 0.108 |
| <b>Histogram Indices</b>    |      |           |        |      |                     |       |
| Kurtosis                    | 1.8  | 0.98-3.31 | 0.059  |      | <i>Not included</i> |       |
| Entropy (log <sub>2</sub> ) | 1.83 | 1.02-3.28 | 0.041  | 2.42 | 1.13-5.21           | 0.024 |
| <b>Shape Indices</b>        |      |           |        |      |                     |       |
| Sphericity                  | 1.96 | 0.94-4.08 | 0.071  |      | <i>Not included</i> |       |
| Compacity                   | 1.72 | 0.94-3.14 | 0.077  | 1.8  | 1.00-3.24           | 0.049 |
| <b>GLCM</b>                 |      |           |        |      |                     |       |
| Entropy (log <sub>2</sub> ) | 1.89 | 1.03-3.49 | 0.041  | 2.23 | 1.23-4.03           | 0.008 |
| Dissimilarity               | 2.15 | 1.19-3.90 | 0.011  | 2.59 | 1.15-5.84           | 0.021 |
| <b>NGLDM</b>                |      |           |        |      |                     |       |
| Coarseness                  | 1.54 | 0.87-2.73 | 0.141  | 2.43 | 1.24-4.79           | 0.01  |
| Contrast                    | 1.95 | 0.98-3.87 | 0.057  |      | <i>Not included</i> |       |
| <b>Percentage changes</b>   |      |           |        |      |                     |       |
| <b>Conventional Indices</b> |      |           |        |      |                     |       |
| SUV <sub>peak</sub>         | 2.04 | 1.13-3.68 | 0.018  |      | <i>Not included</i> |       |
| TLG                         | 2.51 | 1.10-5.75 | 0.029  |      | <i>Not included</i> |       |
| CoV                         | 3.79 | 1.81-7.92 | <0.001 |      | <i>Not included</i> |       |
| MTV                         | 1.64 | 0.86-3.11 | 0.131  |      | <i>Not included</i> |       |
| <b>Histogram Indices</b>    |      |           |        |      |                     |       |
| Entropy (log <sub>2</sub> ) | 2.2  | 1.19-4.06 | 0.011  |      | <i>Not included</i> |       |
| <b>Shape Indices</b>        |      |           |        |      |                     |       |
| Compacity                   | 1.64 | 0.86-3.12 | 0.132  |      | <i>Not included</i> |       |
| <b>GLCM</b>                 |      |           |        |      |                     |       |
| Entropy (log <sub>2</sub> ) | 3.62 | 1.75-7.46 | <0.001 |      | <i>Not included</i> |       |
| Dissimilarity               | 2.68 | 1.35-5.34 | 0.005  |      | <i>Not included</i> |       |
| <b>NGLDM</b>                |      |           |        |      |                     |       |
| Coarseness                  | 1.62 | 0.88-2.99 | 0.124  |      | <i>Not included</i> |       |

PFS = progression-free survival; OS = overall survival; HR = hazard ratio; CI = confidence interval; FOLFIRINOX = folfirinic acid/fluorouracil/irinotecan/oxaliplatin; BMI = body-mass index; DM = diabetes mellitus; ECOG = Eastern Cooperative Oncology Group; CEA = Carcinoembryonic antigen; CA 19-9 = carbohydrate antigen 19-9; SUV = standardized uptake values; TLG = total lesion glycolysis; CoV = coefficient of variation; MTV = metabolic tumor volume; GLCM = gray-level co-occurrence matrix; NGLDM = neighboring gray-level dependence matrix;

\*Variables with the area under the time-dependent receiver operating characteristics curve <0.6 were not included in the univariate analysis.
